# Supplementary material for: An imidazolium iodide salt as a bifunctional co-adsorbent for quasi-solid-state dye-sensitized solar cells: improvements of electron lifetime and charge collection efficiency
Source: Royal Society of Chemistry journal article supplement (doi:10.1039/c8ta11333e), 2019-01-01
Supplement: c8ta11333e1.pdf [file c8ta11333e1.pdf]

**Imidazolium iodide salt as a bifunctional co-adsorbent for quasi-solid-state dye-sensitized solar cells: improvements of electron lifetime and charge collection efficiency**

Haoliang Cheng, Min Wang, Yaru Li, Guanyu Zhao, Zhong-Sheng Wang\*

*Department of Chemistry, Shanghai Key Laboratory of Molecular Catalysis and Innovative Materials, Laboratory of Advanced Materials, iChEM (Collaborative Innovation Center of Chemistry for Energy Materials), Fudan University, 2205 Songhu Road, Shanghai 200438, China*

\*Corresponding author.

E-mail address: zs.wang@fudan.edu.cn

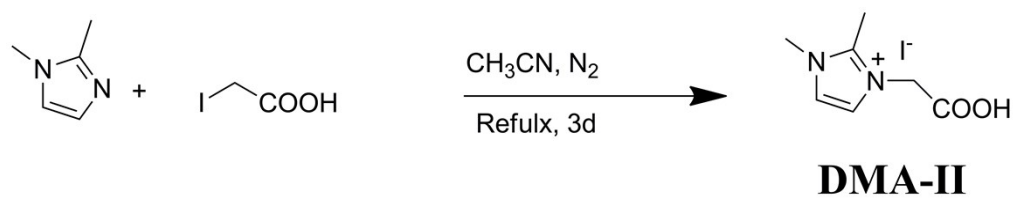

**Figure S1** The synthetic route of **DMA-II**.

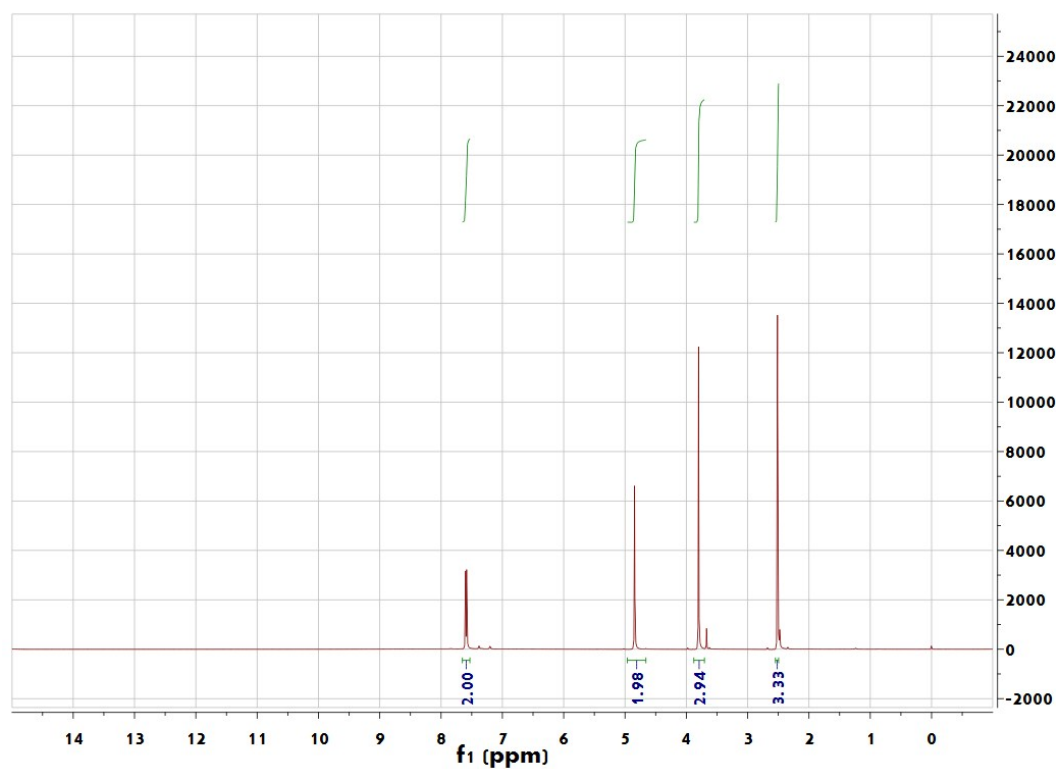

**Figure S2.** <sup>1</sup>H NMR of DMA-II.

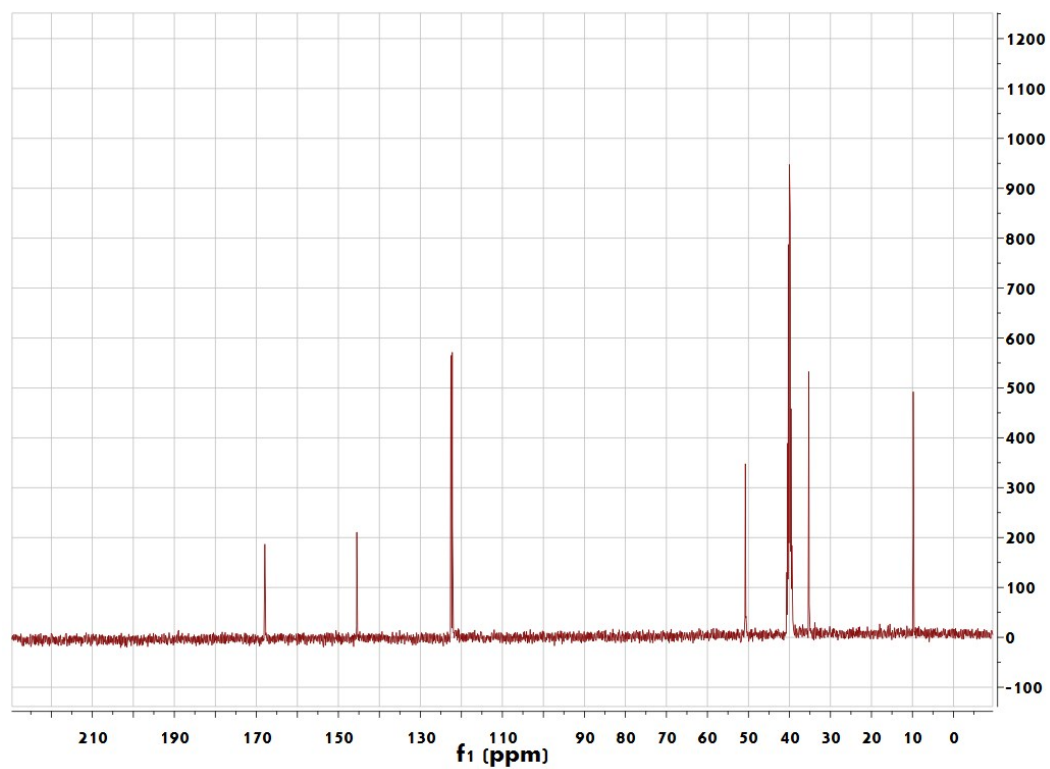

**Figure S3.**  $^{13}\text{C}$  NMR of DMA-II.

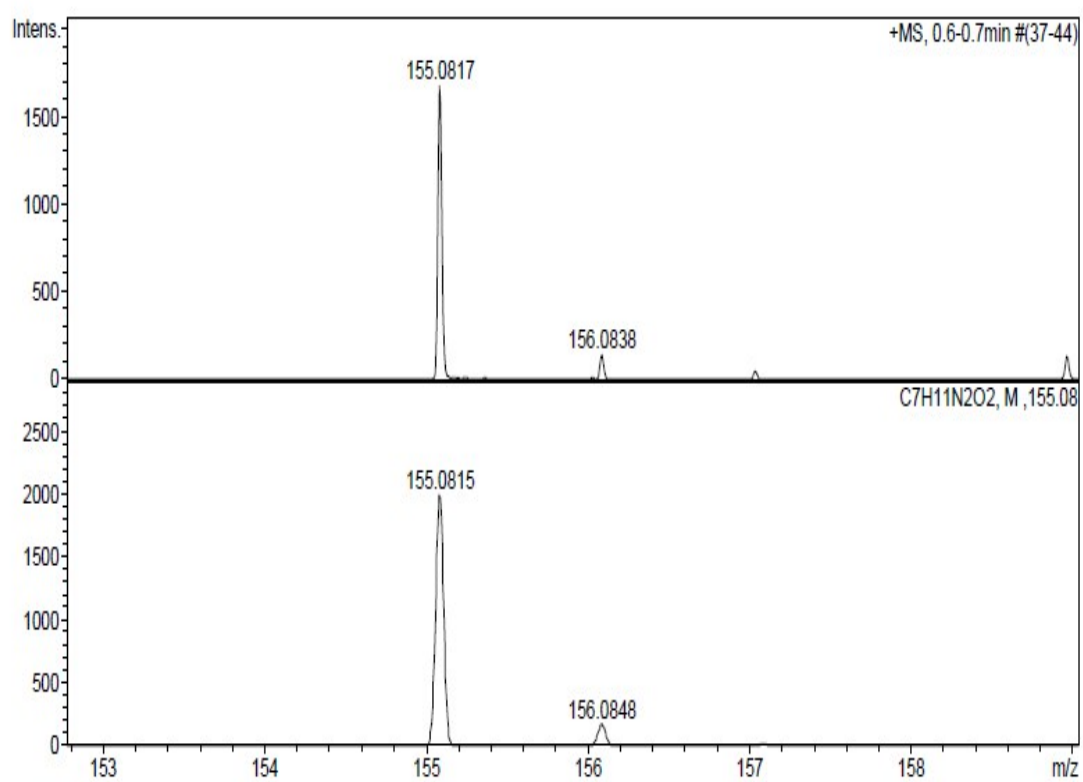

**Figure S4.** HRMS of DMA-II.

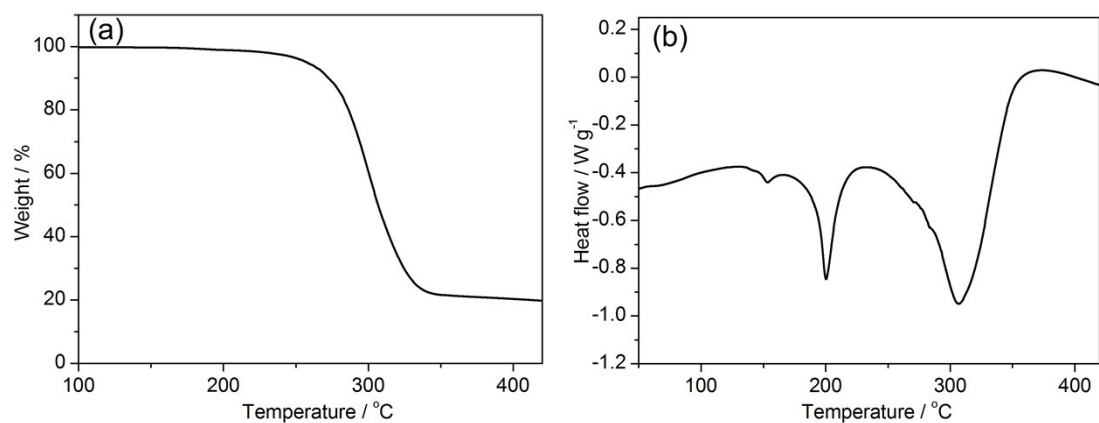

**Fig. S5** (a) TG and (b) DSC curves of DMA-II.

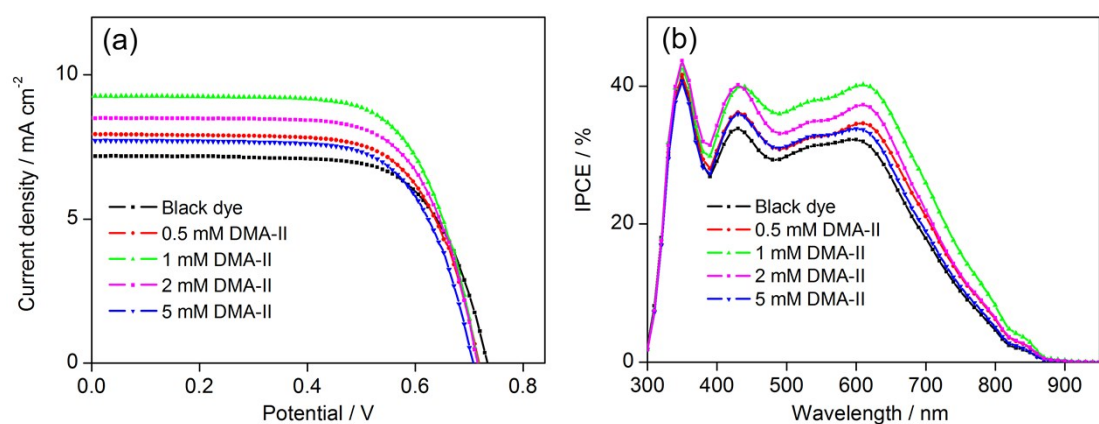

**Fig. S6** (a) Current-potential curves and (b) IPCE action spectra of the DSSCs with a film thickness of 5  $\mu\text{m}$ .

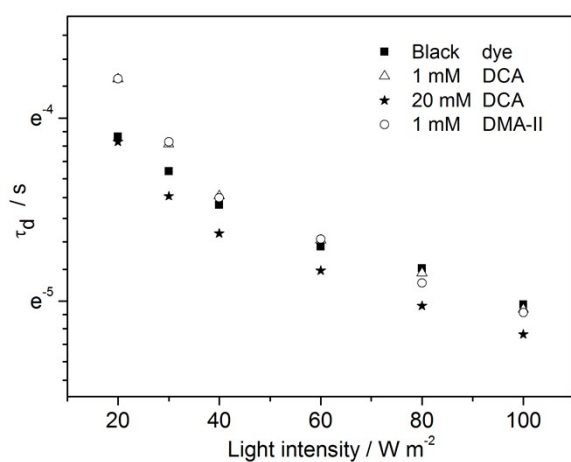

**Fig. S7** Electron transport time as a function of light intensity.

**Table S1.** Photovoltaic performance of DMA-II under different concentrations with a film thickness of 5  $\mu\text{m}$ .

| Coadsorption  | $V_{\text{oc}}$ (mV) | $J_{\text{sc}}$ (mA $\text{cm}^{-2}$ ) | $FF$  | $PCE$ (%) |
|---------------|----------------------|----------------------------------------|-------|-----------|
| No            | 735                  | 7.18                                   | 0.694 | 3.66      |
| 0.5 mM DMA-II | 719                  | 7.93                                   | 0.686 | 3.92      |
| 1 mM DMA-II   | 716                  | 9.26                                   | 0.689 | 4.57      |
| 2 mM DMA-II   | 715                  | 8.49                                   | 0.694 | 4.22      |
| 5 mM DMA-II   | 707                  | 7.72                                   | 0.688 | 3.76      |

**Table S2.** Contributions to  $V_{\text{oc}}$  gain vs. the experimental change of  $V_{\text{oc}}$

| Coadsorption | $\Delta E_{\text{CB}}$<br>(mV) <sup>a</sup> | $Q$<br>( $\mu\text{C cm}^{-2}$ ) <sup>b</sup> | $m_{\text{c}}\ln(Q_2/Q_1)$<br>(mV) <sup>c</sup> | $\Delta E_{\text{CB}}+m_{\text{c}}\ln(Q_2/Q_1)$<br>(mV) | $\Delta V_{\text{oc}}$<br>(mV) <sup>d</sup> |
|--------------|---------------------------------------------|-----------------------------------------------|-------------------------------------------------|---------------------------------------------------------|---------------------------------------------|
| No           | 0                                           | 125.08                                        | 0                                               | 0                                                       | 0                                           |
| 1 mM DCA     | -65                                         | 184.24                                        | 48                                              | -17                                                     | -21                                         |
| 20 mM DCA    | -86                                         | 170.84                                        | 39                                              | -47                                                     | -39                                         |
| 1 mM DMA-II  | -102                                        | 235.32                                        | 79                                              | -23                                                     | -18                                         |

<sup>a</sup>  $\Delta E_{\text{CB}} = E_{\text{CB}}(\text{adsorbent-dye}) - E_{\text{CB}}(\text{black dye})$  is obtained from Fig. 4(a). The negative value indicates a positive shift of CB. <sup>b</sup> The charge density at open circuit is obtained at 100 W  $\text{m}^{-2}$  LED light (532 nm). <sup>c</sup>  $m_{\text{c}}$  is 125 mV obtained from Fig. 4(a). <sup>d</sup>  $\Delta V_{\text{oc}} = V_{\text{oc}}(\text{adsorbent-dye}) - V_{\text{oc}}(\text{black dye})$ . The  $V_{\text{oc}}$  for the DSSCs is measured under AM 1.5G illumination sun-light (100 W  $\text{m}^{-2}$ ).
